# Supplementary material for: Development and validation of a novel prognostic signature in gastric adenocarcinoma
Source: publisher site journal article supplement (doi:10.18632/aging.104161), 2020-11-08
Supplement: Supplementary file [file aging-v12i21-104161-supplementary-material-SD3.pdf]

## SUPPLEMENTARY TABLE

**Supplementary Table 1. Primers used in the study.**

| <b>Gene</b> | <b>Sequence</b>                                                      |
|-------------|----------------------------------------------------------------------|
| FOXD2-AS1   | 5'- AAGCGATCAGCTCCCTTAGC-3'<br>3'- CAGACGCGTGGTGGTTATCT-5'           |
| AC103702.2  | 5'- TACACTGCCTCCTCTCACCAACC-3'<br>3'- ACTTCTCCCCACTCCCTTTCTTCC-5'    |
| LINC01106   | 5'- CTGTGTCGGTGA GTTCTGGTCAAC-3'<br>3'- TCCATTCTCCTCTCCC GTGTAAGC-5' |
| SOX4        | 5'- AAGATCATGGAGCA GTCGCC-3'<br>3'- CGCCTCTCGAATGAAA GGGGA-5'        |
| CCDC34      | 5'- GGTAGCCA GCCA CAACTGTCATC-3'<br>3'- TTAGAGACGCCCGCCA CTACG-5'    |
| ORC6        | 5'- TGGAGGCTAA GTCTGGGCA GTG-3'<br>3'- GTGCTGGGATTA CA GGC GTGAG-5'  |
| GAPDH       | 5'-GAAAGCCTGCCGGTGA CTA A-3'<br>3'-GCCCAATACGA CCAAATCA GAG-5'       |
